# Supplementary material for: Highly Sensitive and Multiplexed Protein Imaging With Cleavable Fluorescent Tyramide Reveals Human Neuronal Heterogeneity
Source: PubMed Central journal article supplement (PMC7874177; doi:10.3389/fcell.2020.614624), 2021-01-08
Supplement: Image_1.pdf [file Image_1.pdf]

## *Supplementary Material*

# **Highly sensitive and multiplexed protein imaging with cleavable fluorescent tyramide reveals human neuronal heterogeneity**

**Renjie Liao<sup>1,†</sup>, Manas Mondal<sup>1,†</sup>, Christopher D. Nazaroff<sup>1,2</sup>, Diego Mastroeni<sup>3,4</sup>,**

**Paul D. Coleman<sup>3,4</sup>, Joshua Labaer<sup>1</sup>, Jia Guo<sup>1\*</sup>**

<sup>1</sup>Biodesign Institute & School of Molecular Sciences, Arizona State University, Tempe, Arizona 85287, USA.

<sup>2</sup>Division of Pulmonary Medicine, Department of Biochemistry and Molecular Biology, Mayo Clinic Arizona, Scottsdale, Arizona 85259, USA.

<sup>3</sup>ASU-Banner Neurodegenerative Disease Research Center, Biodesign Institute and School of Life Sciences, Arizona State University, Tempe, Arizona 85287, USA.

<sup>4</sup>L.J. Roberts Center for Alzheimer's Research, Banner Sun Health Research Institute, Sun City, Arizona 85351, USA.

<sup>†</sup>These authors contributed equally: Renjie Liao, Manas Mondal.

**\* Correspondence:**

Jia Guo

[jiaguo@asu.edu](mailto:jiaguo@asu.edu)

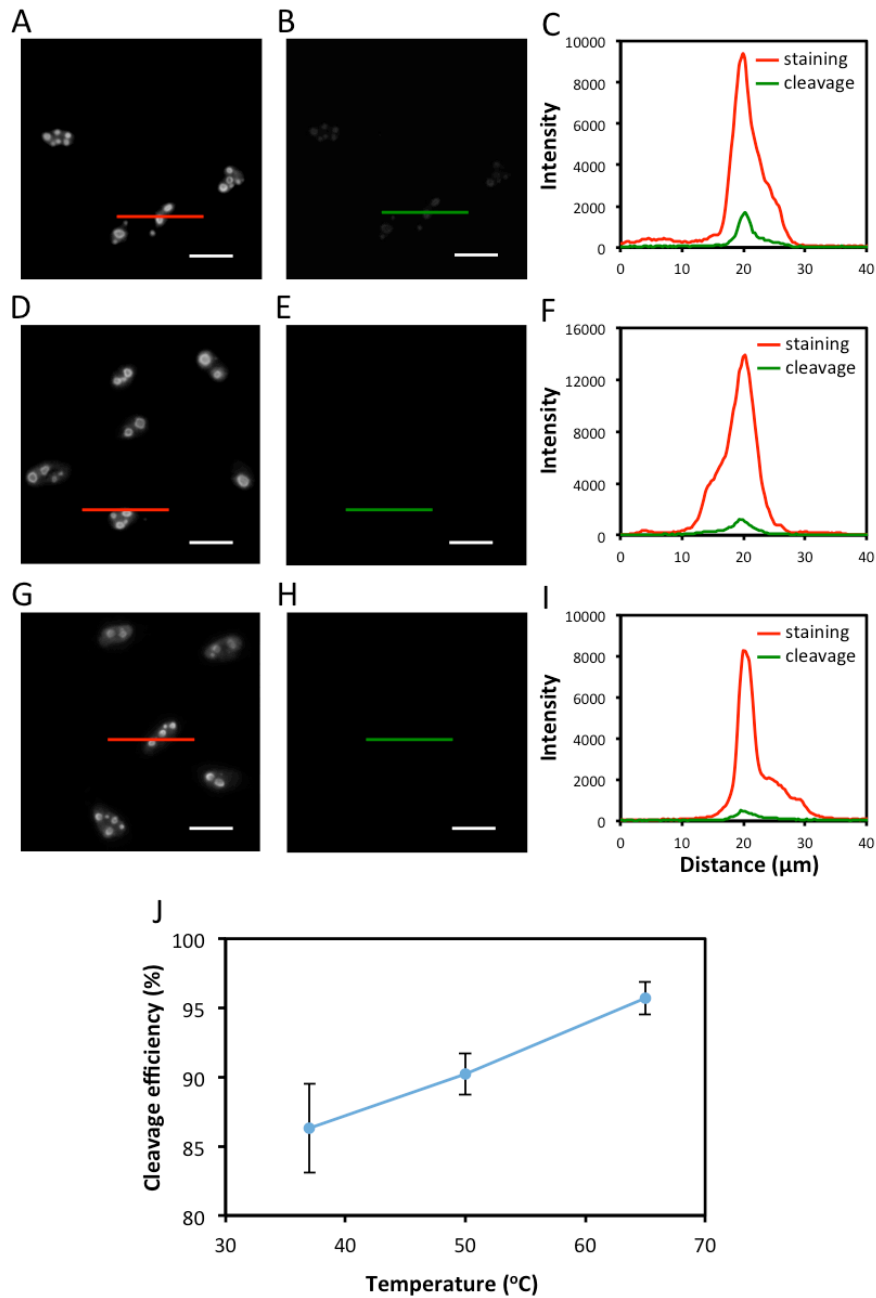

**Supplementary Figure 1.** (A) Protein Ki67 in HeLa cells is stained with tyramide- $N_3$ -Cy5. (B) The stained cells are incubated with TCEP at 37°C for 30 minutes. (C) Fluorescence intensity profile corresponding to the red line and green line positions in (A) and (B). (D) Protein Ki67 in HeLa cells is stained with tyramide- $N_3$ -Cy5. (E) The stained cells are incubated with TCEP at 50°C for 30 minutes. (F) Fluorescence intensity profile corresponding to the red line and green line positions in (D) and (E). (G) Protein Ki67 in HeLa cells is stained with tyramide- $N_3$ -Cy5. (H) The stained cells are incubated with TCEP at 65°C for 30 minutes. (I) Fluorescence intensity profile corresponding to the red line and green line positions in (G) and (H). (J) Fluorophore cleavage efficiency at different reaction temperatures ( $n = 30$  positions). Scale bars, 20  $\mu\text{m}$ .

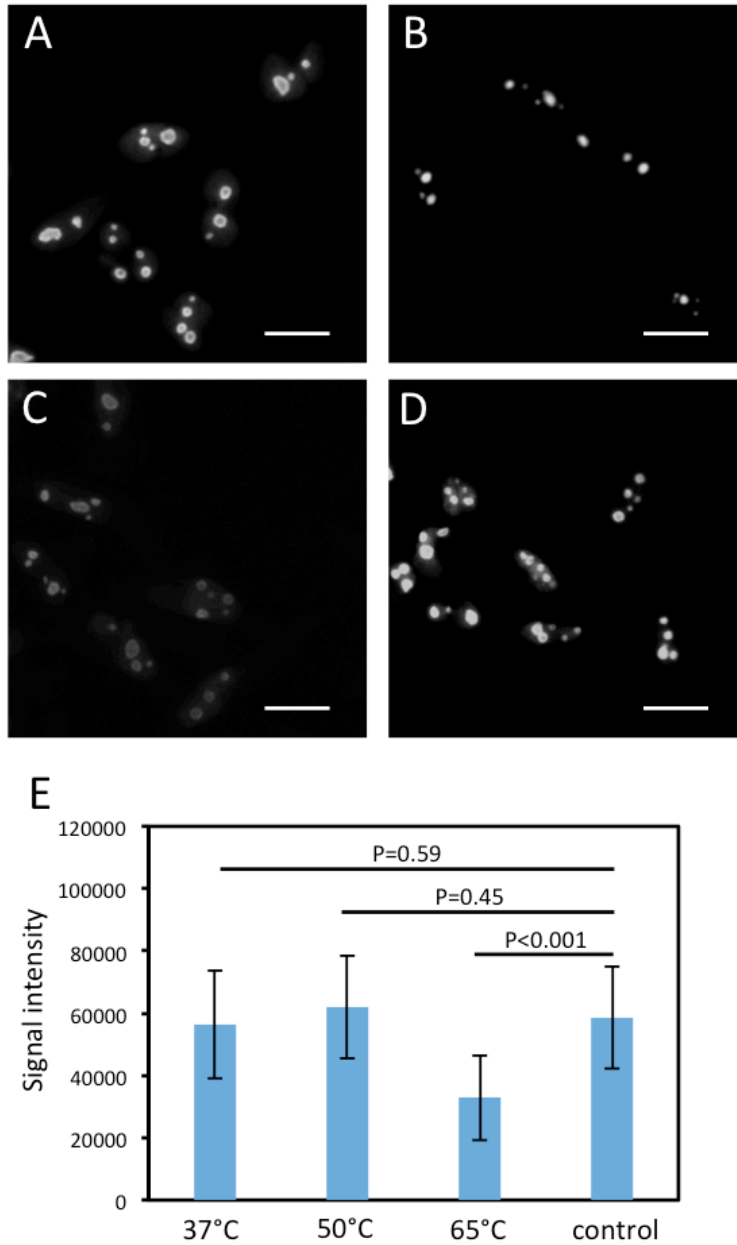

**Supplementary Figure 2.** After incubation with TCEP at (A) 37°C, (B) 50°C and (C) 65°C for 24 hours, or (D) without any TCEP pre-treatment, protein Ki67 in HeLa cells is stained with tyramide-N<sub>3</sub>-Cy5. (E) The obtained signal intensities with TCEP pre-treatment at different temperatures and without any pre-treatment (control) (n = 30 positions). Scale bars, 20 μm.

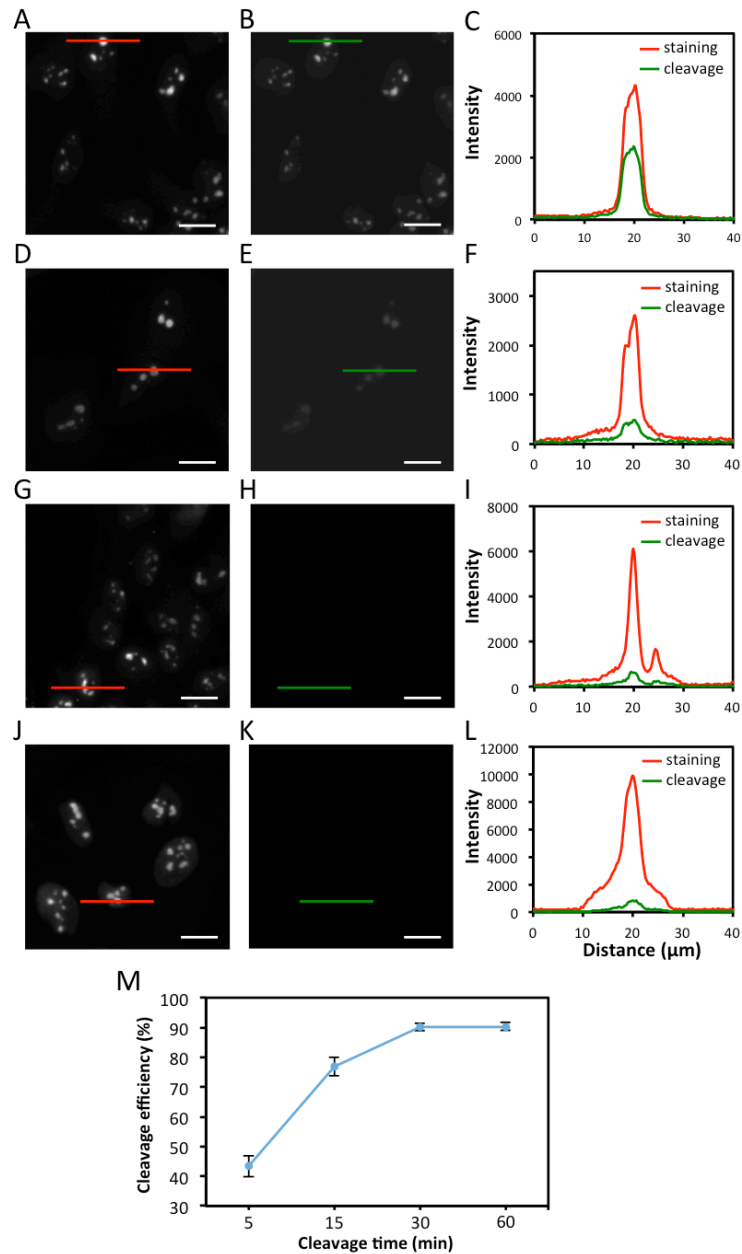

**Supplementary Figure 3.** A) Protein Ki67 in HeLa cells is stained with tyramide- $N_3$ -Cy5. (B) The stained cells are incubated with TCEP at 50°C for 5 minutes. (C) Fluorescence intensity profile corresponding to the red line and green line positions in (A) and (B). (D) Protein Ki67 in HeLa cells is stained with tyramide- $N_3$ -Cy5. (E) The stained cells are incubated with TCEP at 50°C for 15 minutes. (F) Fluorescence intensity profile corresponding to the red line and green line positions in (D) and (E). (G) Protein Ki67 in HeLa cells is stained with tyramide- $N_3$ -Cy5. (H) The stained cells are incubated with TCEP at 50°C for 30 minutes. (I) Fluorescence intensity profile corresponding to the red line and green line positions in (G) and (H). (J) Protein Ki67 in HeLa cells is stained with tyramide- $N_3$ -Cy5. (K) The stained cells are incubated with TCEP at 50°C for 60 minutes. (L) Fluorescence intensity profile corresponding to the red line and green line positions in (J) and (K). (M) Fluorophore cleavage efficiency at different reaction time ( $n = 30$  positions). Scale bars, 20  $\mu\text{m}$ .

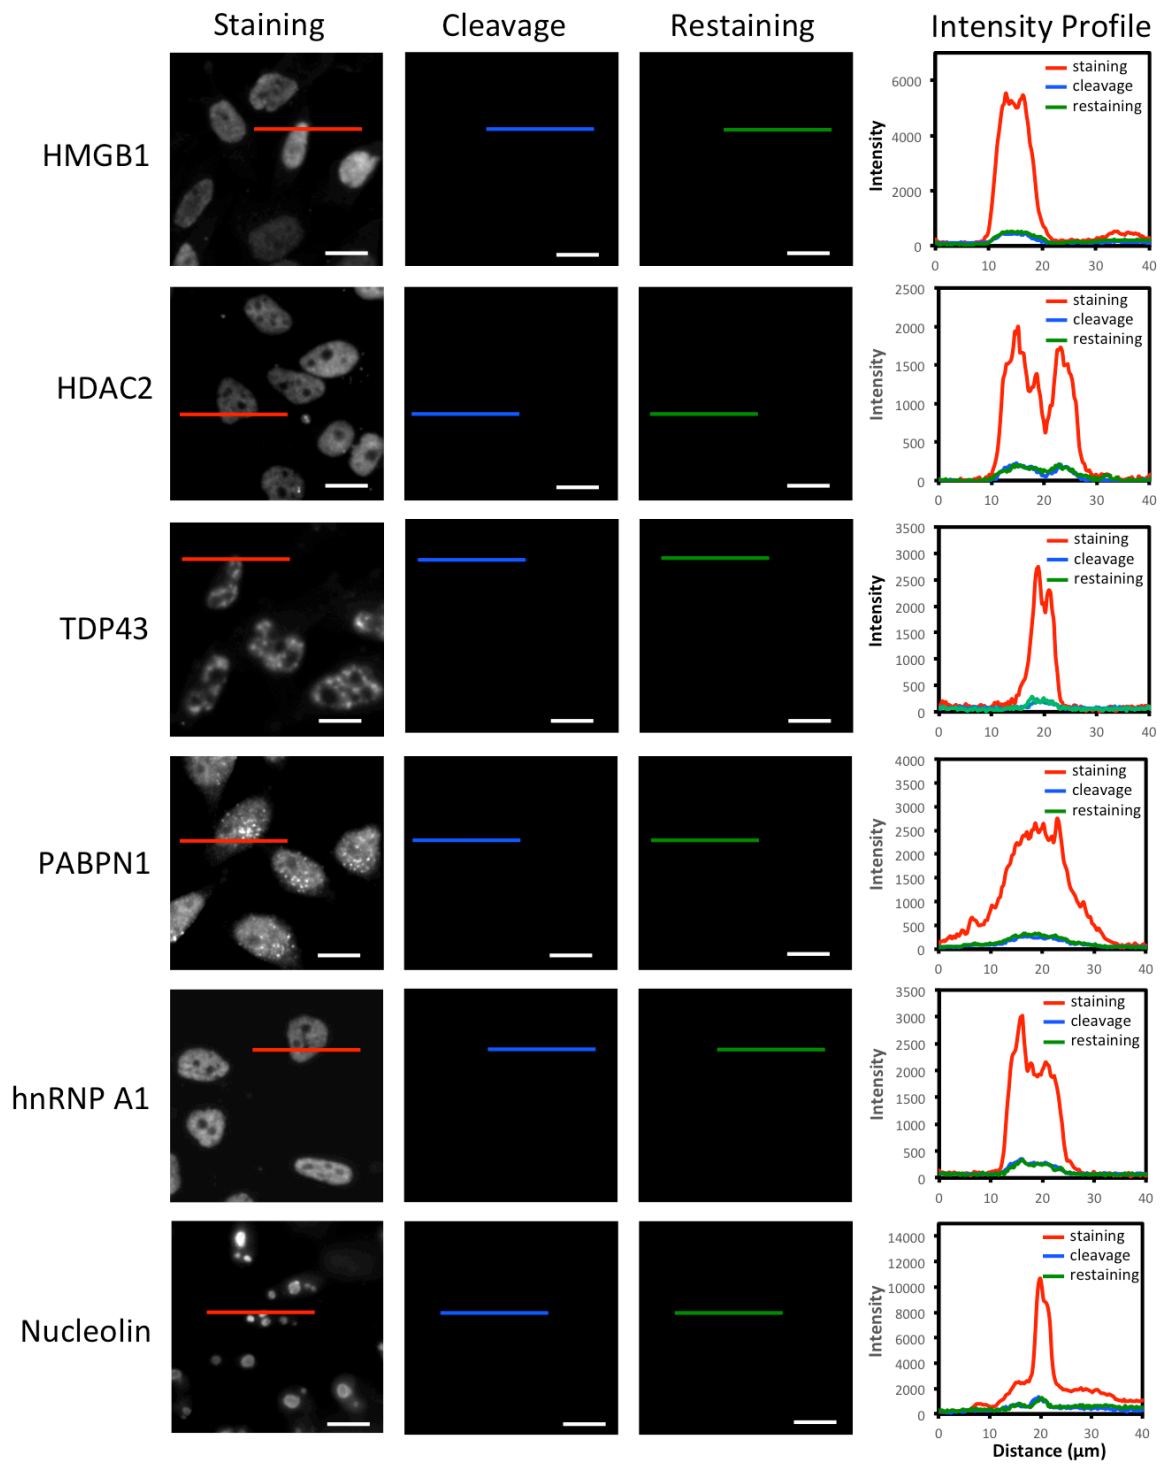

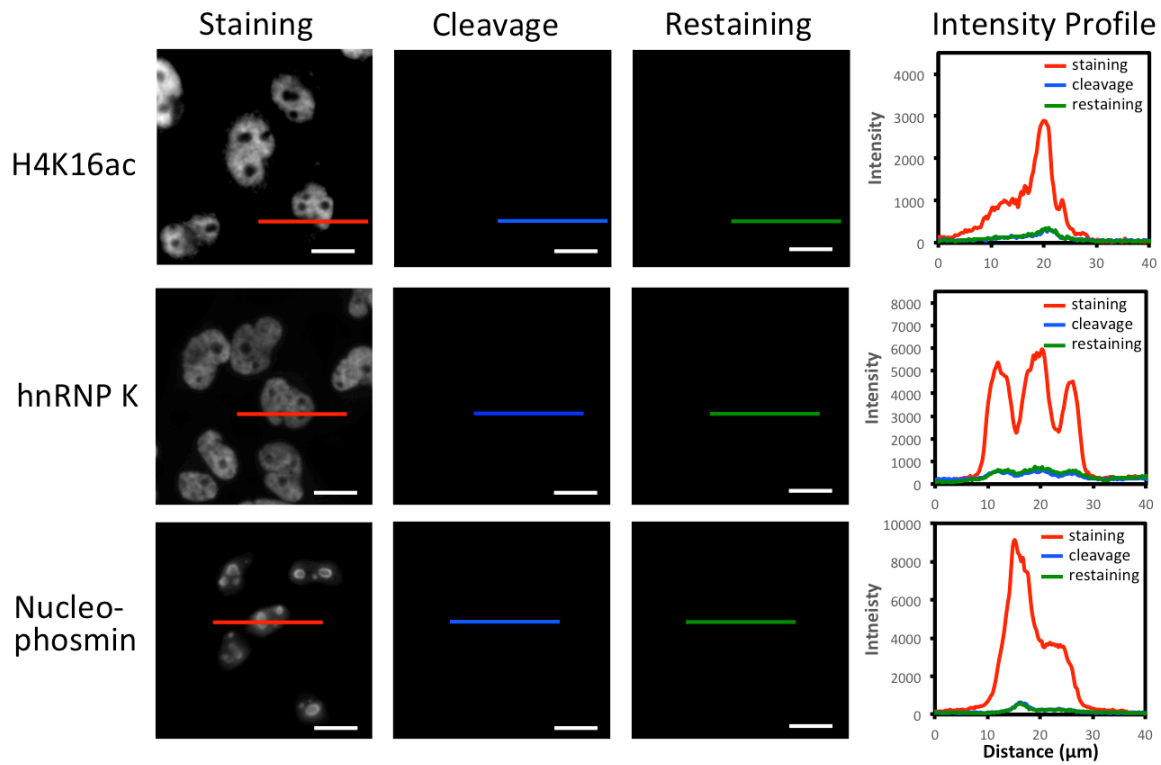

**Supplementary Figure 4.** Different proteins in HeLa cells are stained with HRP conjugated antibodies and tyramide- $N_3$ -Cy5 (the first column). The stained cells are incubated with TCEP (the second column). Subsequently, the cells are incubated with tyramide- $N_3$ -Cy5, again (the third column). Fluorescence intensity profiles corresponding to the red, blue and green line positions in the staining, cleavage and restaining images (the fourth column). Scale bars, 15  $\mu$ m.

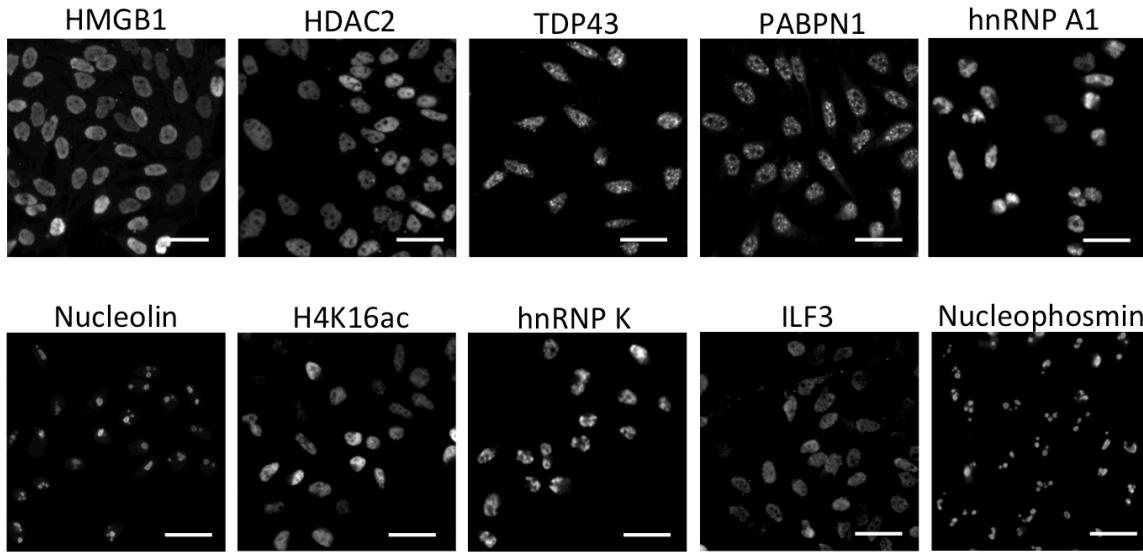

**Supplementary Figure 5.** 10 different proteins are stained with the corresponding HRP conjugated antibodies and Cy5 labeled tyramide in different HeLa cells. Scale bars, 40  $\mu$ m.

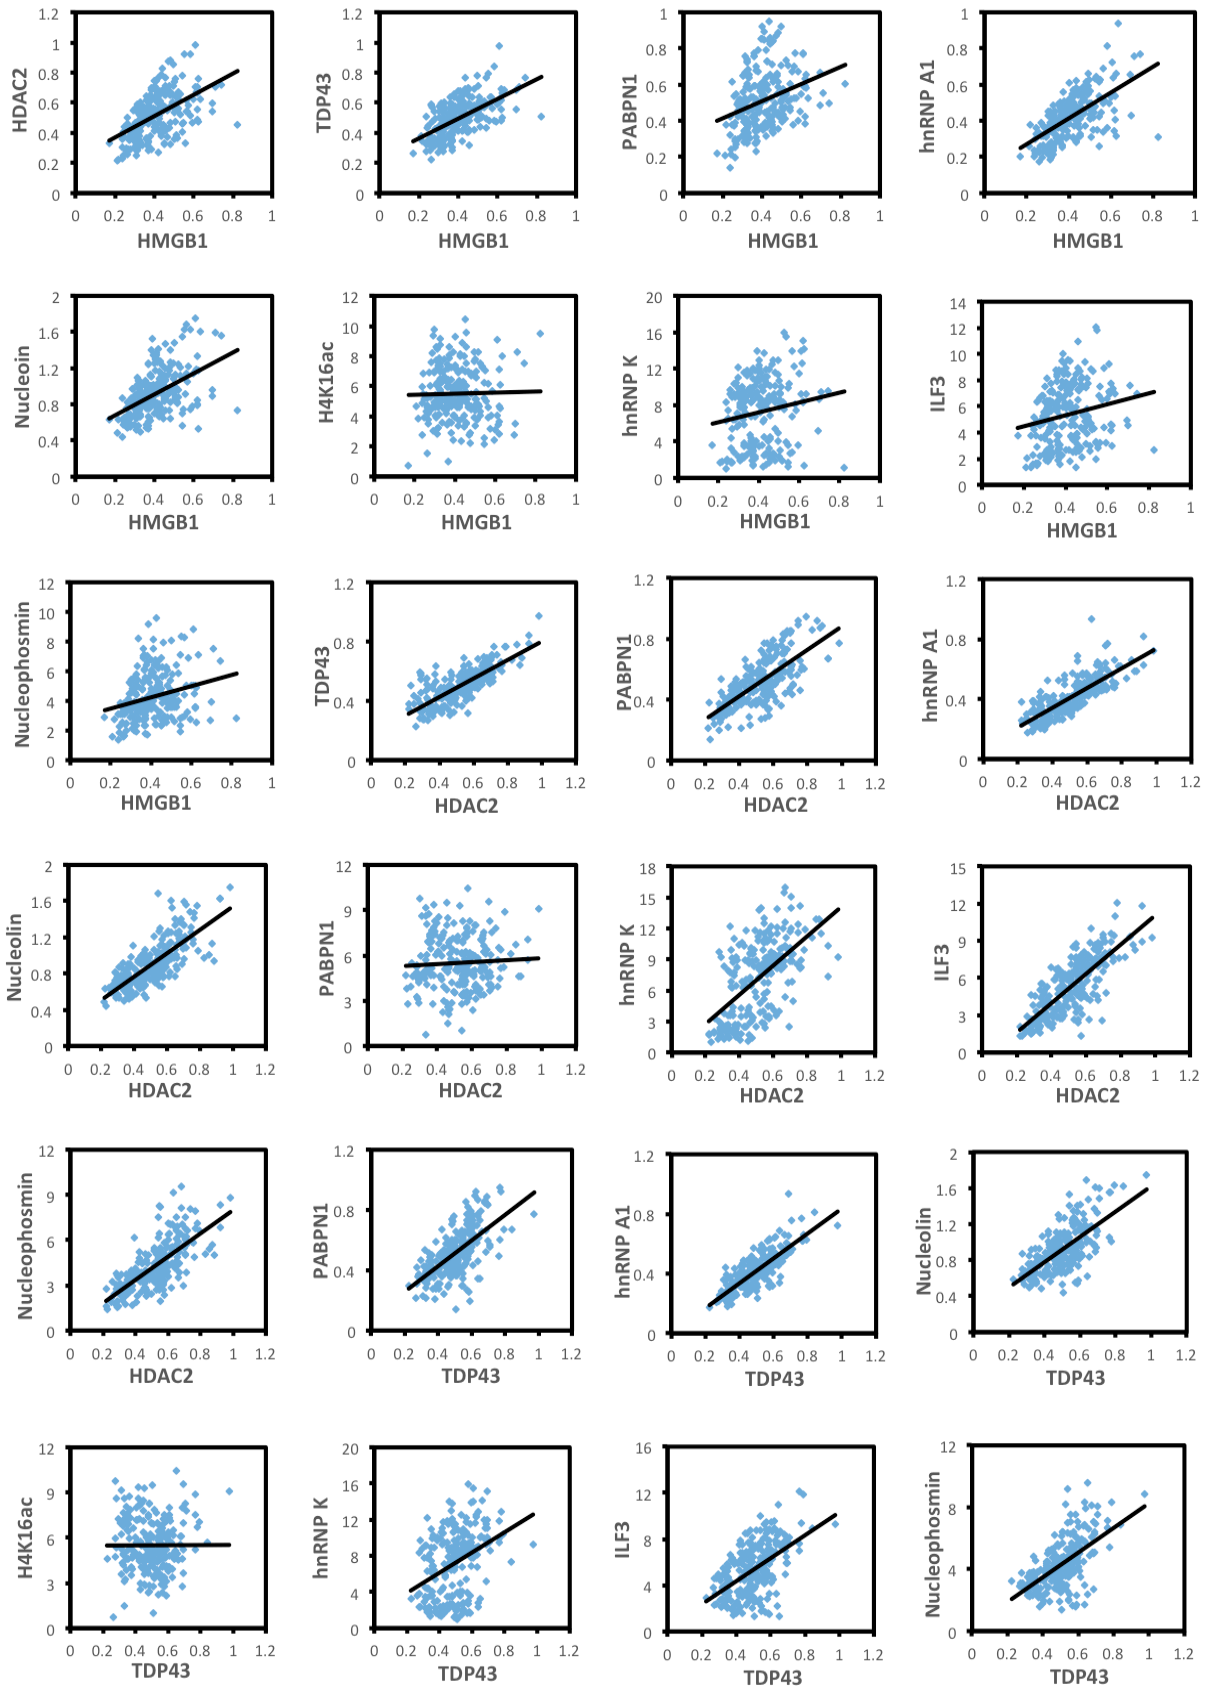



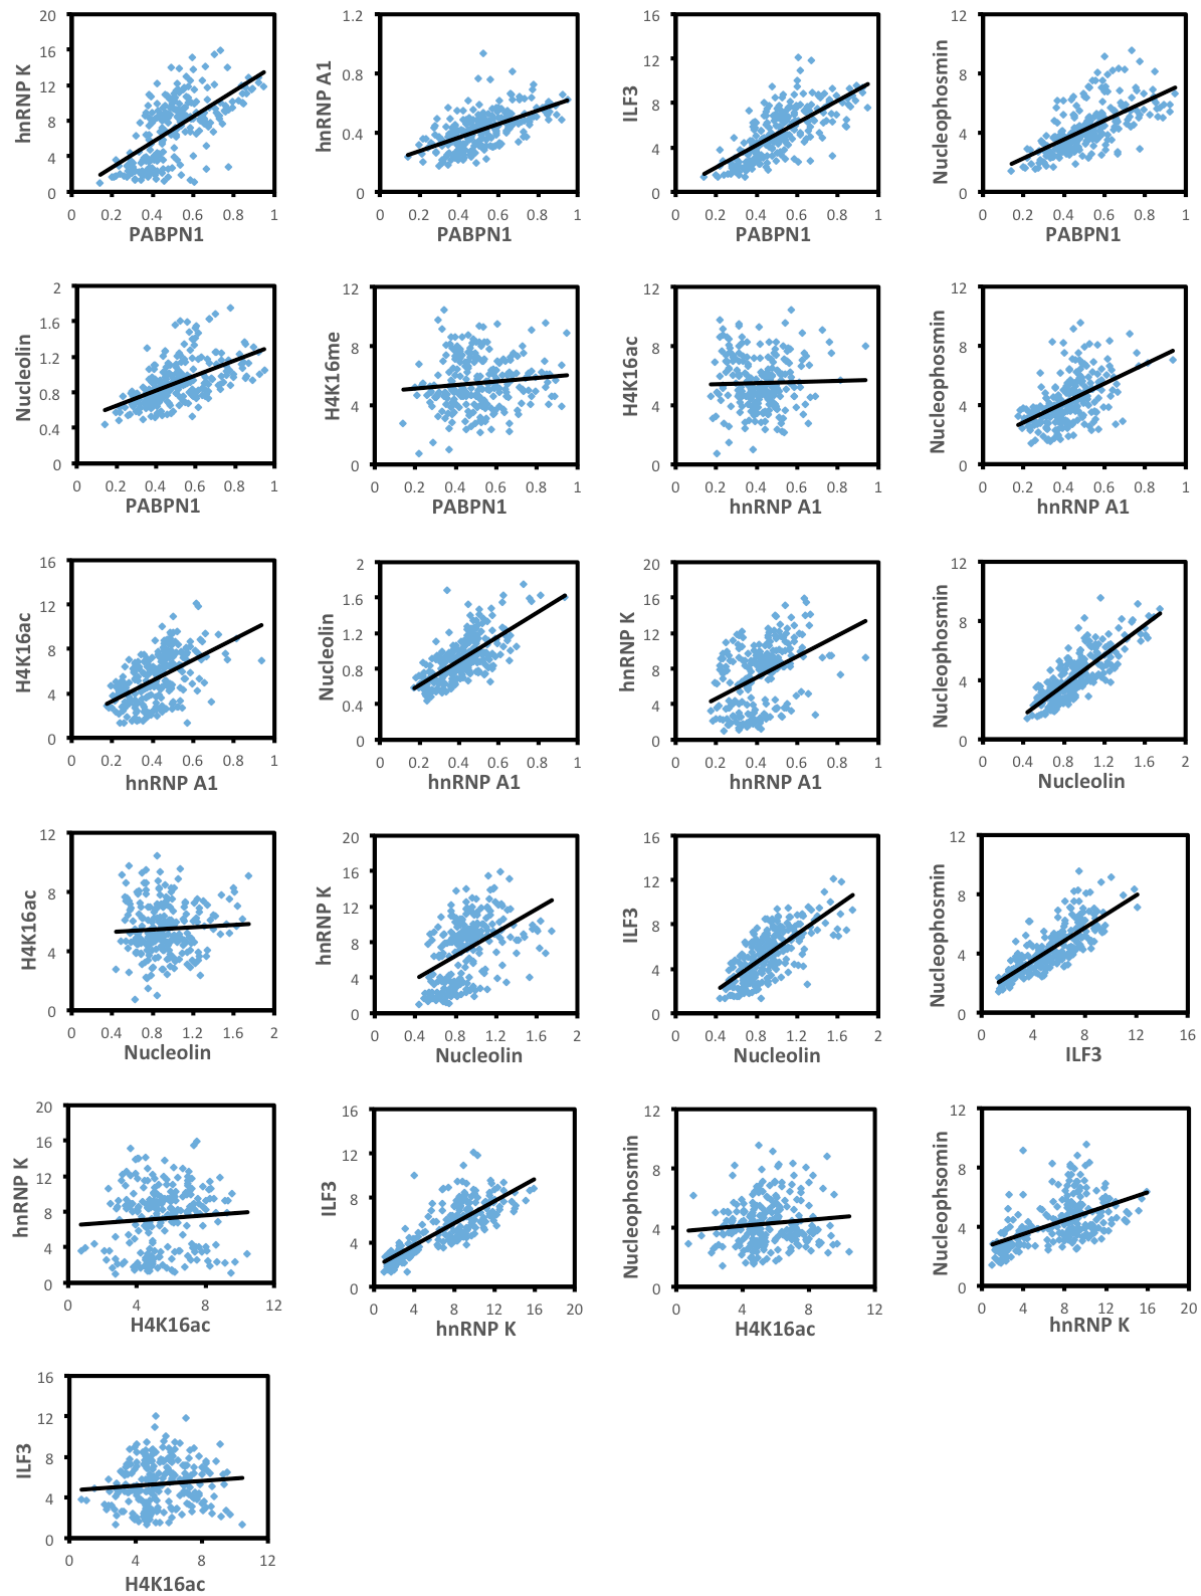

**Supplementary Figure 6.** Raw expression correlation data of each gene pair. Each spot corresponds to one cell with expression levels in the x and y axes ( $\times 10^6$ ).

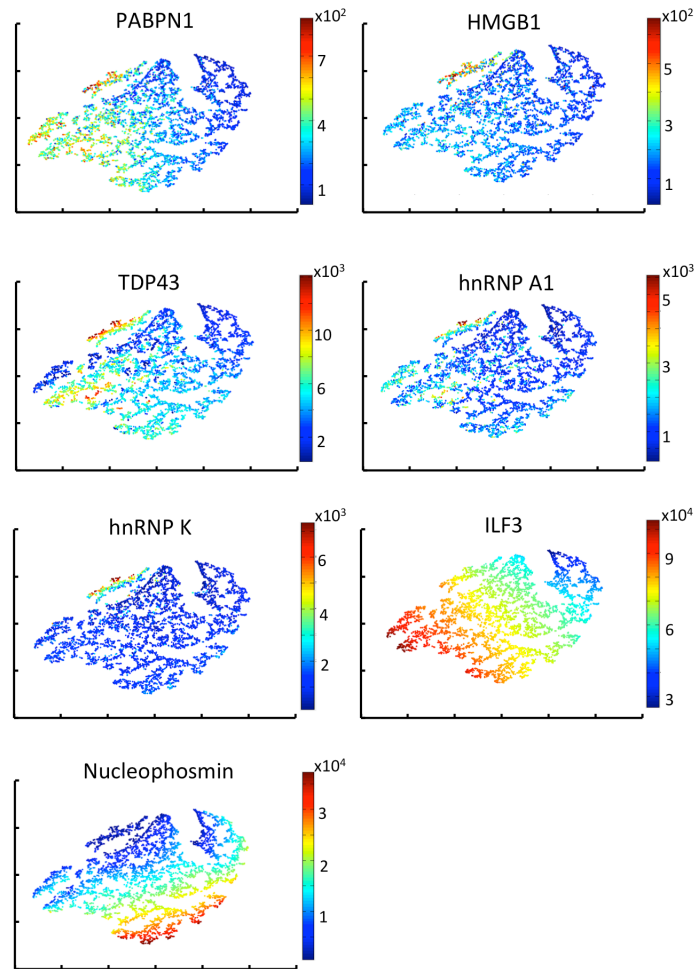

**Supplementary Figure 7.** Distribution of single-cell protein expression in viSNE plots.

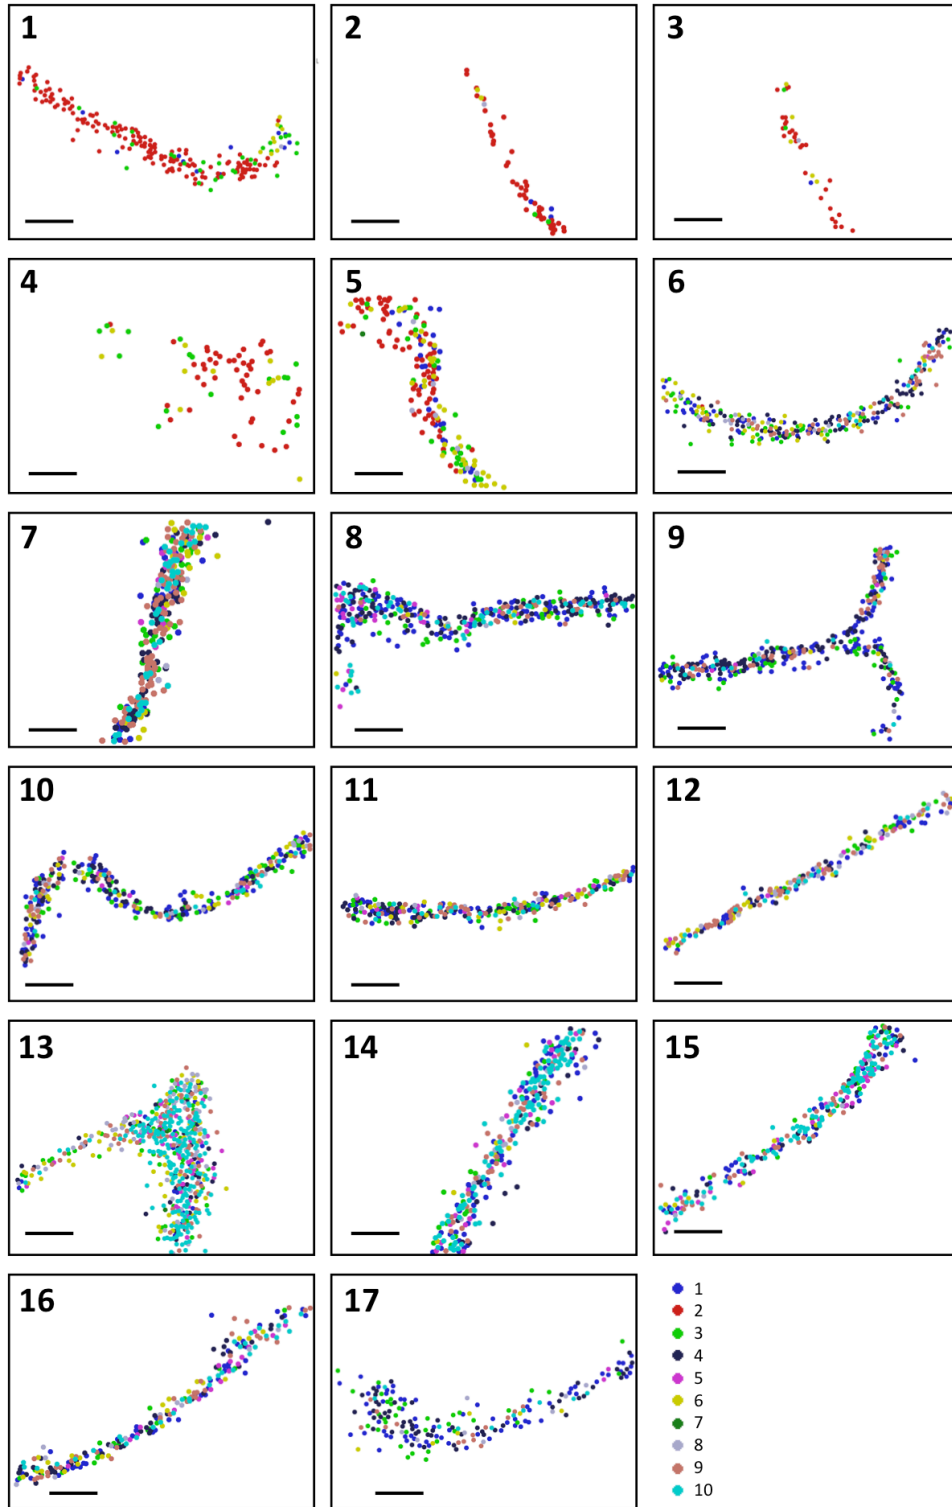

**Figure S8.** Zoom-in views of different regions of interest (ROI) in the dentate gyrus (DG) in Figure 8B. Scale bars, 200  $\mu\text{m}$ .

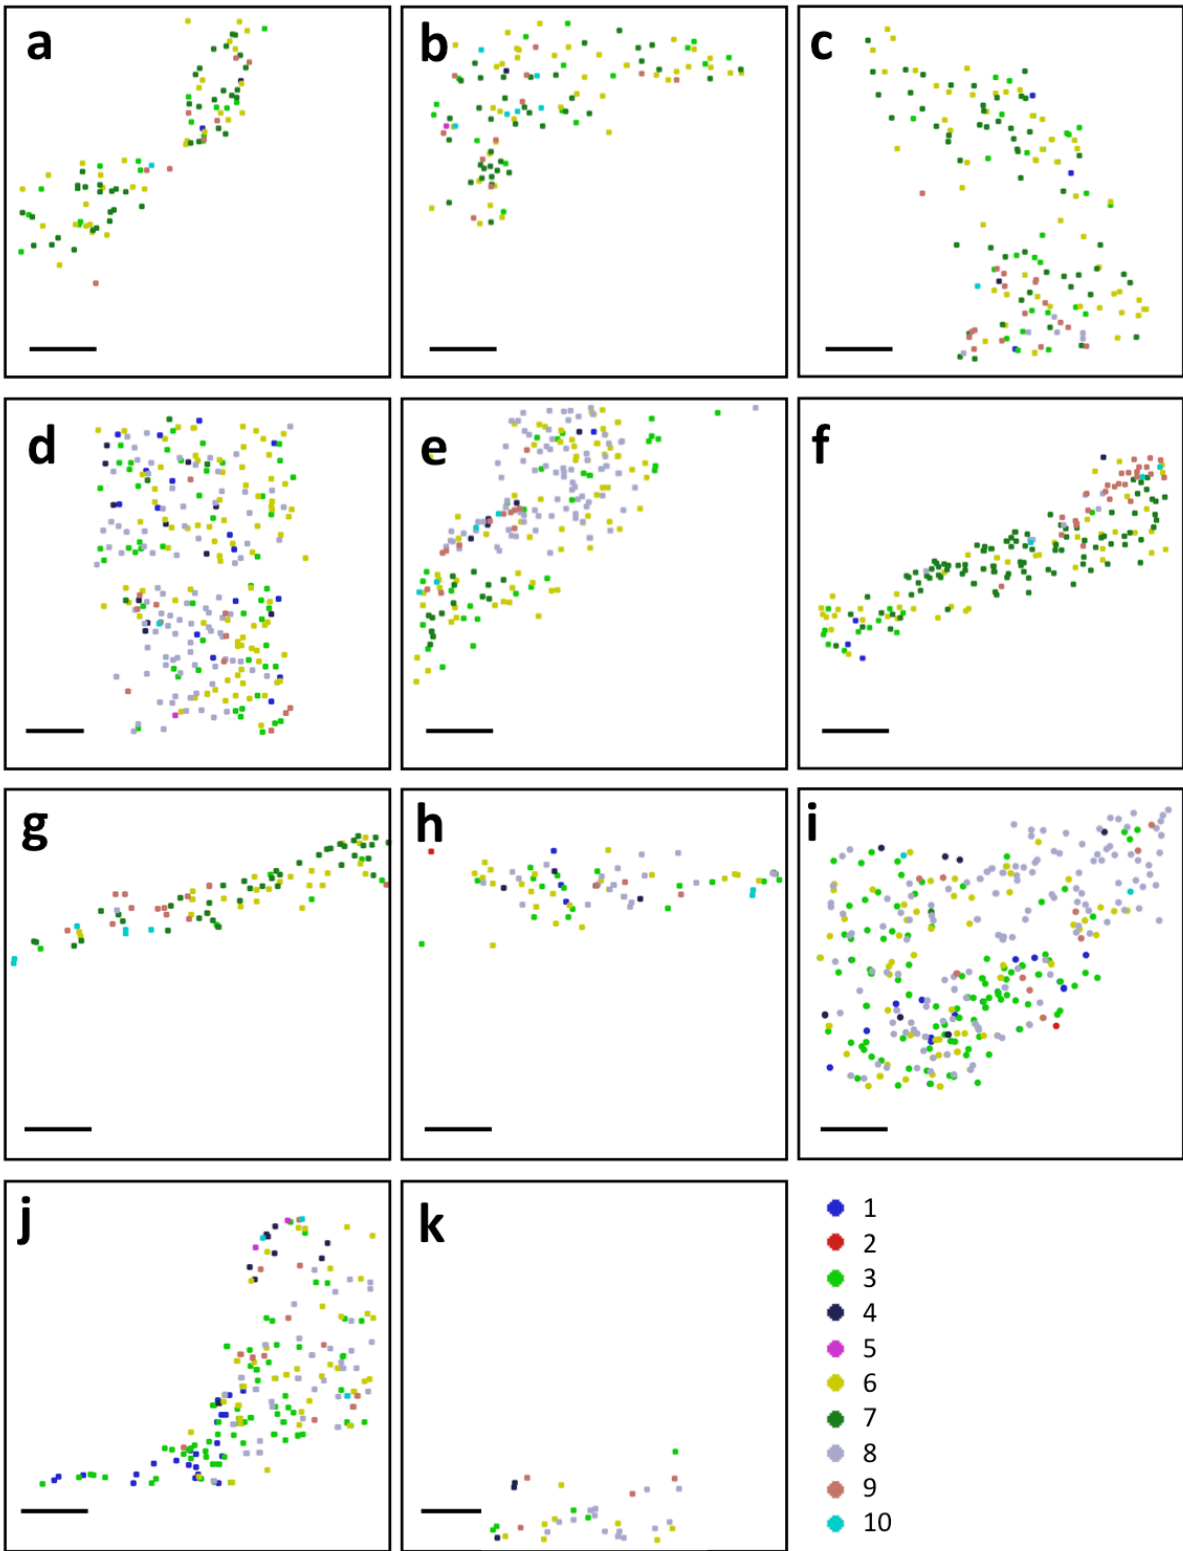

**Supplementary Figure 9.** Zoom-in views of different ROI in the Cornu Ammonis (CA) fields in Figure 8B. Scale bars, 500 μm.

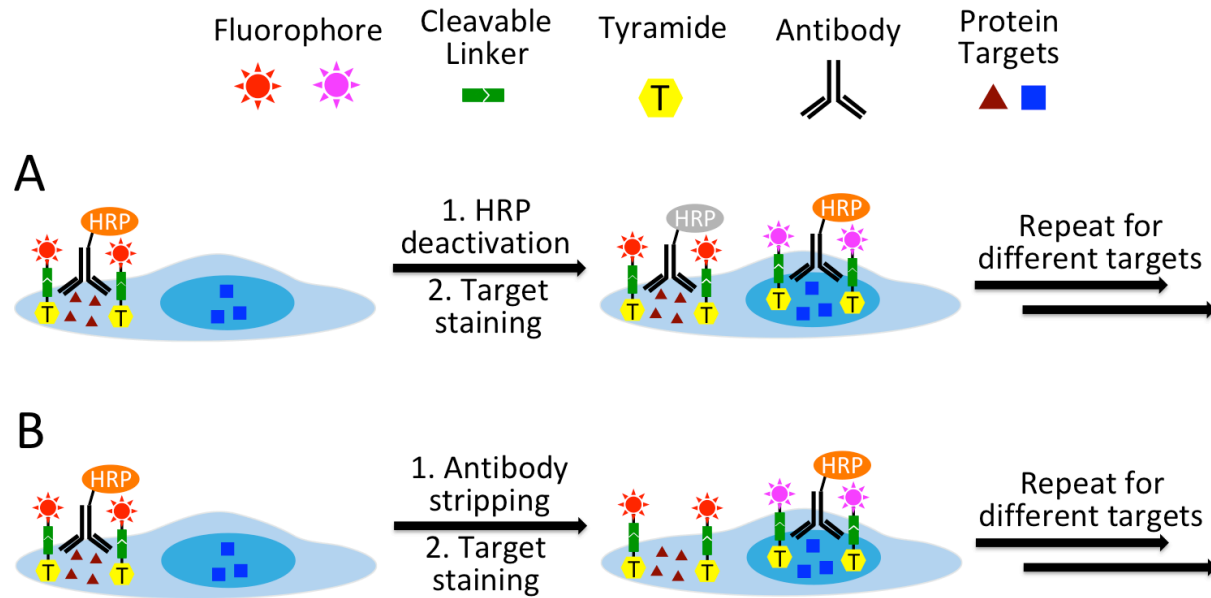

**Supplementary Figure 10.** (A) Through reiterative HRP deactivation or (B) cyclic antibody stripping, multiple protein targets can be detected in each analysis cycle using CFT with different fluorophores.

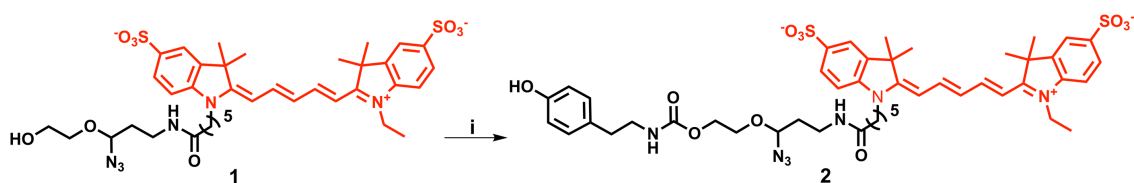

**Supplementary Figure 11.** Synthesis of tyramide-N<sub>3</sub>-Cy5. Reagents and conditions: (i) DSC, DMAP, DMF, rt, 30 min; and then tyramine hydrochloride, DIPEA, rt, 2 h.

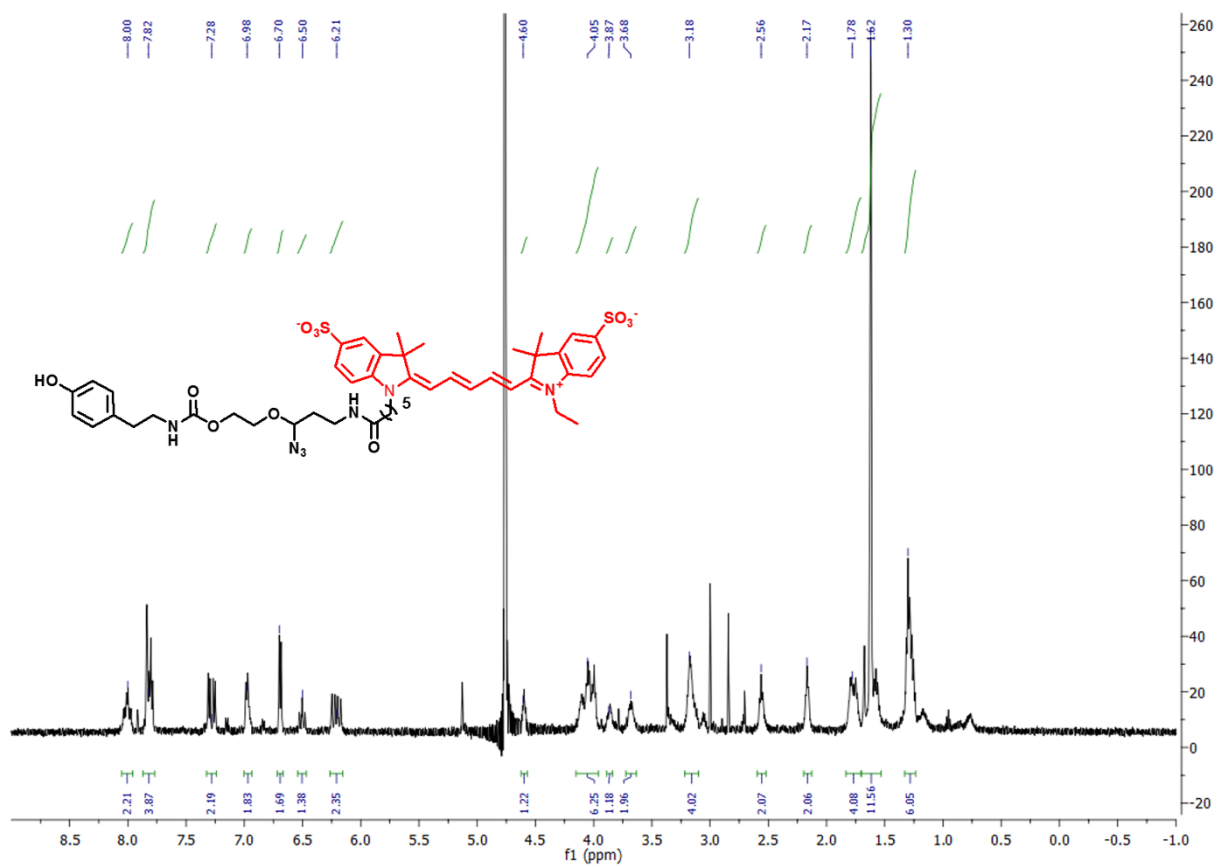

Supplementary Figure 12. <sup>1</sup>H NMR of tyramide-N3-Cy5 (500 MHz, CD<sub>3</sub>OD)
